# Supplementary material for: Combination therapy with crizotinib and vinblastine for relapsed or refractory pediatric ALK-positive anaplastic large cell lymphoma
Source: PubMed Central journal article supplement — Haematologica. 2022 Dec 15;108(5):1442–6. doi: 10.3324/haematol.2022.281896 (PMC10153539; doi:10.3324/haematol.2022.281896), 2022-12-15
Supplement: 2022_281896_KNORR_SUPPL.pdf [file 2022_281896_KNORR_SUPPL.pdf]

# Combination therapy with crizotinib and vinblastine for relapsed or refractory pediatric ALK-positive anaplastic large cell lymphoma

Fabian Knörr,<sup>1,2\*</sup> Kim PJ Schellekens,<sup>3,4\*</sup> Reineke A Schoot,<sup>3</sup> Judith Landman-Parker,<sup>5</sup> Heiko-Manuel Teltschik,<sup>6</sup> Jan Förster,<sup>1</sup> Amambay Riquelme,<sup>1</sup> Alwin DR Huitema,<sup>3,7,8</sup> Natasha KA van Eijkelenburg,<sup>3</sup> Auke Beishuizen,<sup>3,4</sup> C Michel Zwaan,<sup>3,4</sup> Wilhelm Woessmann<sup>1#</sup> and Jasper van der Lugt<sup>3#</sup>

<sup>1</sup>Pediatric Hematology and Oncology, University Medical Center Hospital Hamburg-Eppendorf, Hamburg, Germany; <sup>2</sup>Mildred Scheel Cancer Career Center HaTriCS4, University Medical Center Hamburg-Eppendorf, Hamburg, Germany; <sup>3</sup>Princess Máxima Center for Pediatric Oncology, Utrecht, The Netherlands; <sup>4</sup>Erasmus Medical Center, Sophia Children's Hospital, Rotterdam, The Netherlands; <sup>5</sup>Pediatric Hematology, Immunology, Oncology, Sorbonne Université, Hôpital Armand Trousseau, APHP, Paris, France; <sup>6</sup>Pediatrics 5 – Oncology, Hematology, and Immunology, Olgahospital, Stuttgart, Germany; <sup>7</sup>Department of Pharmacy and Pharmacology, Netherlands Cancer Institute, Amsterdam, The Netherlands and <sup>8</sup>Department of Clinical Pharmacy, University Medical Center Utrecht, Utrecht University, Utrecht, The Netherlands

*\*FK and KPJS contributed equally as co-first authors*

*#WW and JvdL contributed equally as senior authors*

Correspondence:

F. KNÖRR - f.knoerr@uke.de

<https://doi.org/10.3324/haematol.2022.281896>

# Supplementary appendix

## Combination therapy with crizotinib and vinblastine for relapsed or refractory pediatric ALK-positive anaplastic large cell lymphoma

### Author list

Fabian Knörr<sup>1-2\*</sup>, Kim Schellekens<sup>3,4\*</sup>, Reineke Schoot<sup>3</sup>, Judith Landman-Parker<sup>5</sup>, Heiko-Manuel Teltschik<sup>6</sup>, Jan Förster<sup>1</sup>, Amambay Riquelme<sup>1</sup>, Alwin Huitema<sup>3,7,8</sup>, Natasha van Eijkelenburg<sup>3</sup>, Auke Beishuizen<sup>3,4</sup>, C. Michel Zwaan<sup>3,4</sup>, Wilhelm Woessmann<sup>1\*\*</sup>, Jasper van der Lugt<sup>3\*\*</sup>

### Author affiliations

- 1 Pediatric Hematology and Oncology, University Medical Center Hospital Hamburg-Eppendorf, Hamburg, Germany
  - 2 Mildred Scheel Cancer Career Center HaTriCS4, University Medical Center Hamburg-Eppendorf, Hamburg, Germany
  - 3 Princess Máxima Center for Pediatric Oncology, Utrecht, The Netherlands
  - 4 Erasmus Medical Center, Sophia Children's Hospital, Rotterdam, The Netherlands
  - 5 Pediatric Hematology, Immunology, Oncology, Sorbonne université, Hôpital Armand Trousseau, APHP, Paris, France
  - 6 Pediatrics 5 (Oncology, Hematology, and Immunology), Olgahospital, Stuttgart, Germany
  - 7 Dept. Pharmacy & Pharmacology, Netherlands Cancer Institute, Amsterdam, The Netherlands
  - 8 Dept. Clinical Pharmacy, University Medical Center Utrecht, Utrecht University, Utrecht, The Netherlands
- \* These authors contributed equally  
\*\* These authors contributed equally

## List of supplementary material

|                                                                 |   |
|-----------------------------------------------------------------|---|
| Supplementary Table 1: Additional patient characteristics ..... | 2 |
| Supplementary Figure 1: Event-free survival .....               | 3 |
| Supplementary Figure 2: Overall survival .....                  | 3 |

Supplementary Table 1: Additional patient characteristics

| Patient     | Initial Diagnosis |      |      | Relapse Diagnose |      |      | MRD* | Response                       | Outcome, last FU                          |
|-------------|-------------------|------|------|------------------|------|------|------|--------------------------------|-------------------------------------------|
|             | BM                | CNS  | MDD  | BM               | CNS  | MDD  |      |                                |                                           |
| <b>TP1</b>  | pos.              | neg. | n.d. | pos.             | neg. | pos. | n.d. | Not evaluated                  | Died of infection (1 mo.)                 |
| <b>TP2</b>  | neg.              | neg. | pos. | neg.             | n.d. | pos. | neg. | CR                             | FOP (18 mo.)                              |
| <b>RP1</b>  | pos.              | neg. | pos. | n.a.             | pos. | pos. | pos. | PR (Sonography, 6 weeks)       | Died of lymphoma (2,9 mo.)                |
| <b>RP2</b>  | neg.              | neg. | neg. | n.d.             | n.d. | pos. | neg. | PR (PET-CT, 6 weeks)           | FOP (67,7 mo.)                            |
| <b>RP3</b>  | neg.              | neg. | pos. | pos.             | neg. | pos. | neg. | n. a.                          | FOP after Relapse <sup>#</sup> (46,2 mo.) |
| <b>RP4</b>  | neg.              | neg. | pos. | neg.             | neg. | pos. | neg. | unknown                        | FOP (44,1 mo.)                            |
| <b>RP5</b>  | neg.              | neg. | pos. | delayed neg.     | neg. | pos. | n.d. | CR (MRI, 5 weeks)              | FOP (41,7 mo.)                            |
| <b>RP6</b>  | neg.              | neg. | n.d. | pos.             | neg. | n.d. | n.d. | CR (MRI, 8 weeks)              | FOP (30,1 mo.)                            |
| <b>RP7</b>  | neg.              | neg. | pos. | neg.             | neg. | n.d. | n.d. | CR (PET-CT, 8 weeks)           | FOP (38,1 mo.)                            |
| <b>RP8</b>  | neg.              | neg. | neg. | neg.             | neg. | neg. | n.d. | CR (MRI, 4 weeks)              | FOP (18,8 mo.)                            |
| <b>RP9</b>  | neg.              | neg. | n.d. | neg.             | neg. | pos. | n.d. | CR (Sonography, MRI, 12 weeks) | FOP (30,9 mo.)                            |
| <b>RP10</b> | neg.              | neg. | pos. | neg.             | n.a. | pos. | neg. | CR (MRI, 4 weeks)              | FOP (23,1 mo.)                            |
| <b>RP11</b> | neg.              | neg. | neg. | neg.             | neg. | pos. | neg. | CR (MRI, CT, 8 weeks)          | FOP (19,2 mo.)                            |

BM, bone marrow involvement, CNS, central nervous system involvement, MDD, minimal disseminated disease, MRD, minimal residual disease, allo-SCT, allogeneic stem-cell transplantation, PR, partial response, CR, complete response, as defined by the International Pediatric Non-Hodgkin Lymphoma Response Criteria, n. d., not done, n. a., not available

\* before allogeneic SCT or last MRD measurement after initiation of second line therapy

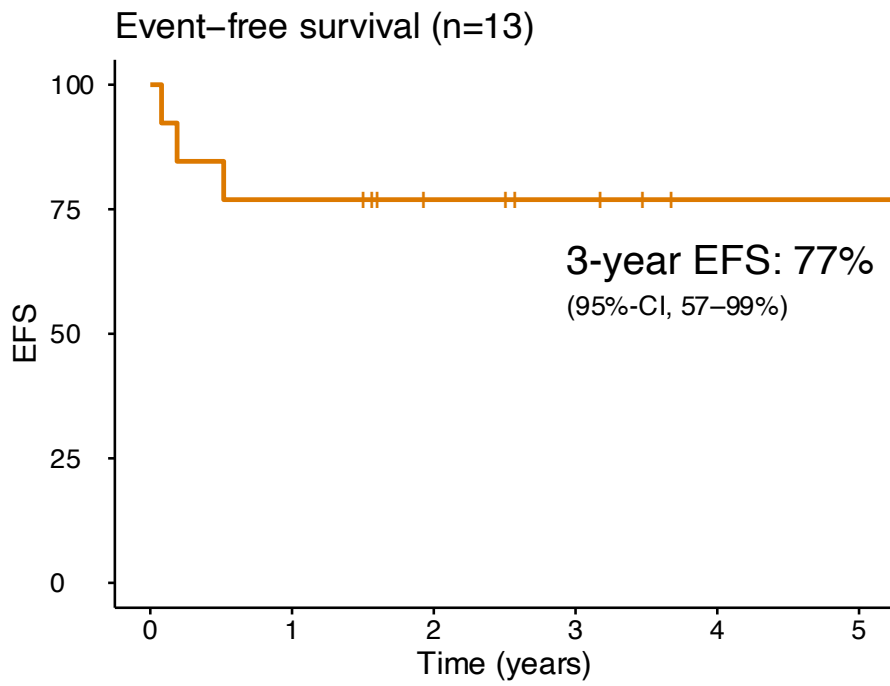

Supplementary Figure 1: Event-free survival of 13 patients treated with the combination of vinblastine and crizotinib. Event-free time is defined as time from first relapse to any event (Relapse, Progression, Secondary Malignancy, Death from any cause).

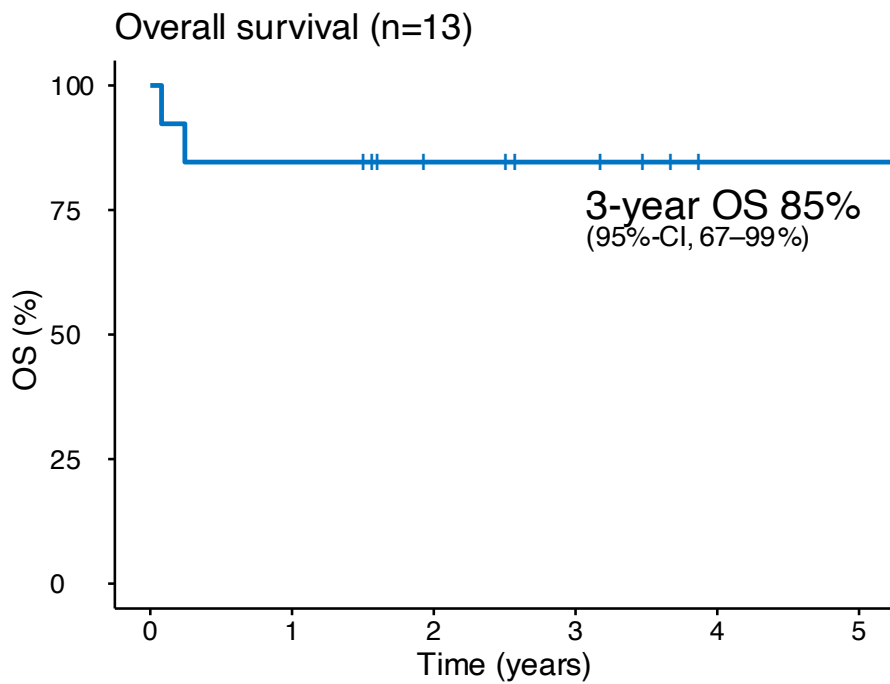

Supplementary Figure 2: Overall survival of 13 patients treated with the combination of vinblastine and crizotinib. Overall survival time is defined as time from first relapse to death of any cause.
